# Supplementary material for: Electromagnetic radiation driving of volume changes in nanocomposites made of a thermosensitive hydrogel polymerized around conducting polymer nanoparticles
Source: Royal Society of Chemistry journal article supplement (doi:10.1039/d0ra01329c), 2020-01-01
Supplement: d0ra01329c1.pdf [file d0ra01329c1.pdf]

## Electromagnetic radiation driving of volume changes in nanocomposites made of a thermosensitive hydrogel polymerized around conducting polymer nanoparticles

Silvestre Bongiovanni Abel,<sup>a,‡</sup> Claudia R. Rivarola,<sup>a</sup> Cesar A. Barbero,<sup>a</sup> and Maria Molina<sup>a,\*</sup>

<sup>a</sup> Instituto de Investigaciones en Tecnologías Energéticas y Materiales Avanzados (IITEMA), Departamento de Química, Universidad Nacional de Río Cuarto (UNRC)-Consejo Nacional de Investigaciones Científicas y Técnicas (CONICET). Ruta Nacional N° 36 Km 601, Agencia Postal N° 3, 5800, Río Cuarto, Argentina.

### Supplementary Information

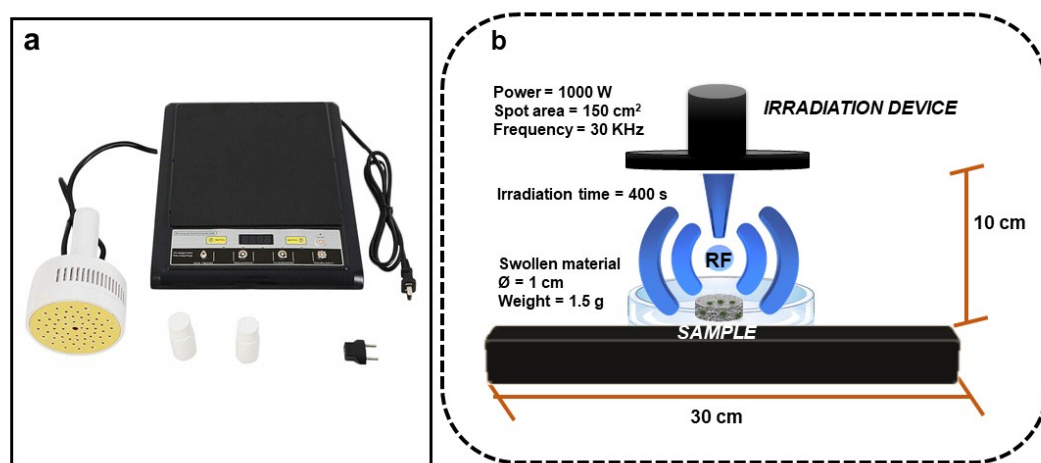

**Figure 1 SI.** a) Device used to perform the radiofrequency (RF) irradiation and b) diagram of the irradiation experiment.

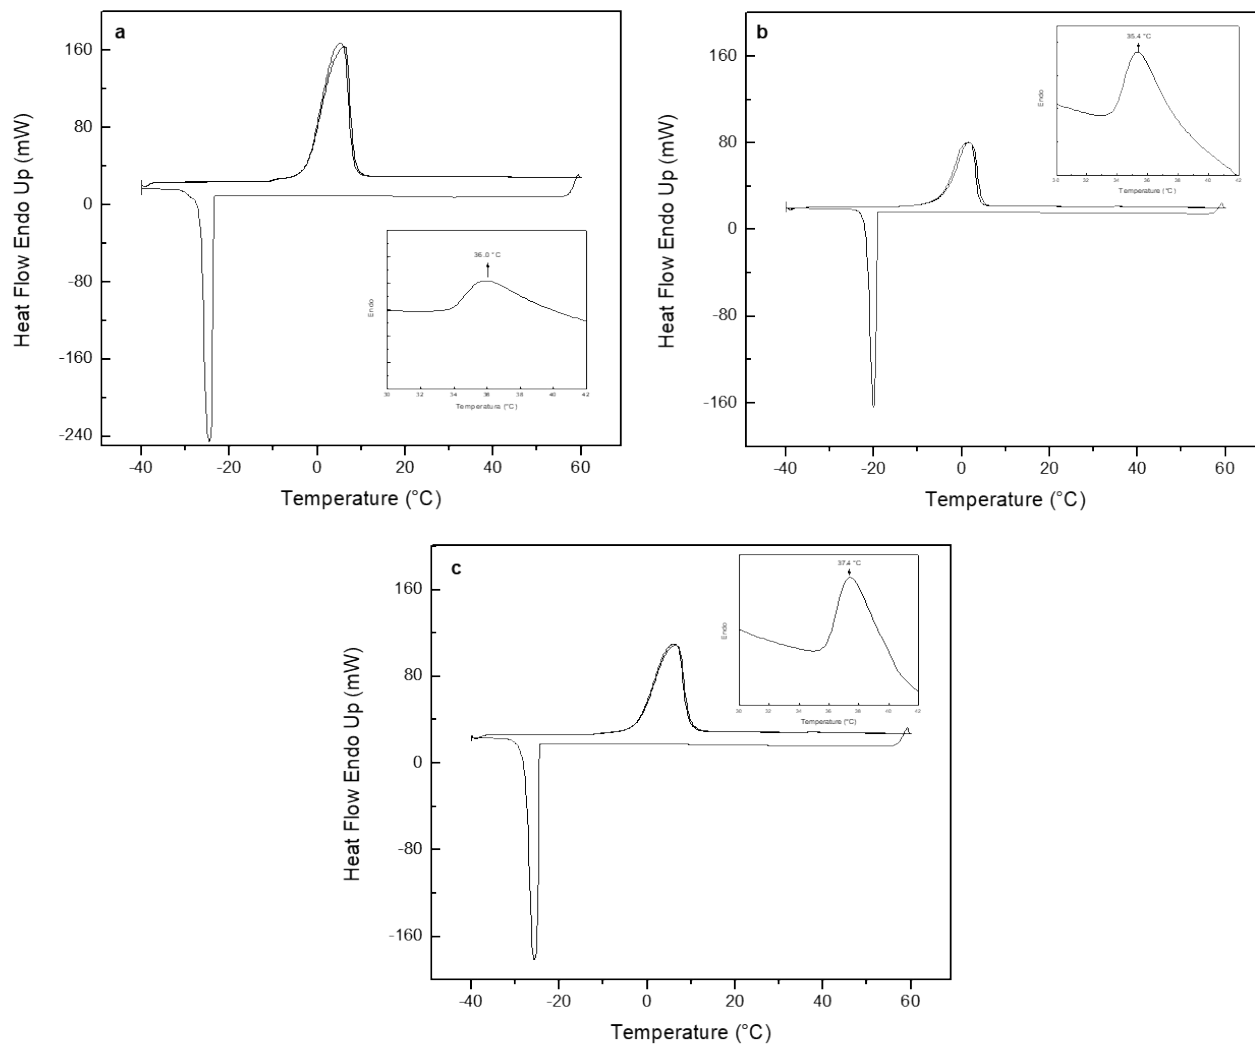

**Figure 2 SI.** Differential scanning calorimetric plots for: a) HG@PPy NP, b) HG@PANI NF, and c) HG@PANI NP.

**Table 1 SI.** Irradiation sources used to generate the photothermal effect on composites.

| <b>Electromagnetic radiation</b> | <b>Power (W)</b> | <b>Spot area (cm<sup>2</sup>)</b> |
|----------------------------------|------------------|-----------------------------------|
| Microwaves (MW) 2.4 GHz          | 700              | Whole                             |
| Radiofrequency (RF) 30 kHz       | 1000             | 150                               |
